# Supplementary material for: A visible-light-gated donor–acceptor Stenhouse adduct chemosensor: synthesis, photochromism and naked-eye colorimetric/fluorometric sensing of Al3+ and Zn2+
Source: Royal Society of Chemistry journal article supplement (doi:10.1039/d2nj00969b), 2022-01-01
Supplement: d2nj00969b1.pdf [file d2nj00969b1.pdf]

# Electronic Supplementary Information

## A visible-light-gated donor–acceptor Stenhouse adducts chemosensor: Synthesis, photochromism and naked-eye colorimetric/fluorimetric sensing for Al<sup>3+</sup> and Zn<sup>2+</sup>

Peng Fu <sup>a,b</sup>, Qing Yan <sup>b</sup>, Sheng Wang <sup>a,b,\*</sup>, Hanlun Wu <sup>a</sup>, Derong Cao <sup>a,\*</sup>

*<sup>a</sup>School of Chemistry and Chemical Engineering, State Key Laboratory of Luminescent Materials and Devices, South China University of Technology, Guangzhou, 510641, China*

*<sup>b</sup>School of Chemistry and Chemical Engineering, Key Laboratory of Clean Energy Materials Chemistry of Guangdong Higher Education Institutes, Research Center for West Guangdong biomedical Engineering & Technology in Universities of Guangdong, Lingnan Normal University, Zhanjiang, 524048, China.*

*\* Corresponding authors.*

*E-mail addresses: [dyesws@126.com](mailto:dyesws@126.com) (S. Wang), [drcao@scut.edu.cn](mailto:drcao@scut.edu.cn) (D. -R. Cao).*

### Table of Contents

Section 1. Reported dual chemosensors for Al<sup>3+</sup> & Zn<sup>2+</sup> ions.

Section 2. Compound characterization

Section 3. Photochromic properties study of **ND-O**

Section 4. Colorimetric detection of Al<sup>3+</sup> and fluorescence response of Zn<sup>2+</sup>

Section 5. X-ray crystallographic analysis for **1** and **2**

## Section 1. Reported dual chemosensors for Al<sup>3+</sup> & Zn<sup>2+</sup> ions.

Table S1 Few parameters of dual chemosensors for Al<sup>3+</sup> & Zn<sup>2+</sup> ions.

| Compound structure                                                                  | Analyte                            | Detection Method             | Solvent system                      | Reversibility | LOD(M)                                                                                 | Mechanism                   | Ref.             |
|-------------------------------------------------------------------------------------|------------------------------------|------------------------------|-------------------------------------|---------------|----------------------------------------------------------------------------------------|-----------------------------|------------------|
| 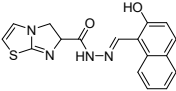   | Al <sup>3+</sup> /Zn <sup>2+</sup> | Fluorimetric                 | MeOH/H <sub>2</sub> O               | yes           | 1.45×10 <sup>-7</sup> (Al <sup>3+</sup> )<br>1.29×10 <sup>-7</sup> (Zn <sup>2+</sup> ) | CHEF,<br>C=N isomerization  | 40               |
|    | Al <sup>3+</sup> /Zn <sup>2+</sup> | Fluorimetric                 | MeOH/H <sub>2</sub> O               | -             | 8.30×10 <sup>-8</sup> (Al <sup>3+</sup> )<br>1.24×10 <sup>-7</sup> (Zn <sup>2+</sup> ) | ESIPT                       | 19               |
|    | Al <sup>3+</sup> /Zn <sup>2+</sup> | Fluorimetric                 | MeOH/H <sub>2</sub> O               | -             | 2.24×10 <sup>-7</sup> (Al <sup>3+</sup> )<br>4.10×10 <sup>-8</sup> (Zn <sup>2+</sup> ) | ESIPT,<br>C=N isomerization | 41               |
|    | Al <sup>3+</sup> /Zn <sup>2+</sup> | Colorimetric<br>Fluorimetric | DMSO/H <sub>2</sub> O               | -             | 3.70×10 <sup>-9</sup> (Al <sup>3+</sup> )<br>3.00×10 <sup>-8</sup> (Zn <sup>2+</sup> ) | CHEF                        | 18               |
|   | Al <sup>3+</sup> /Zn <sup>2+</sup> | Fluorimetric                 | EtOH/H <sub>2</sub> O               | -             | 7.88×10 <sup>-8</sup> (Al <sup>3+</sup> )<br>5.22×10 <sup>-8</sup> (Zn <sup>2+</sup> ) | PET,<br>C = N isomerization | 42               |
|  | Al <sup>3+</sup> /Zn <sup>2+</sup> | Fluorimetric                 | MeOH                                | -             | 1.00×10 <sup>-7</sup> (Al <sup>3+</sup> )<br>4.98×10 <sup>-8</sup> (Zn <sup>2+</sup> ) | CHEF, PET                   | 43               |
|  | Al <sup>3+</sup> /Zn <sup>2+</sup> | Fluorimetric                 | MeOH/H <sub>2</sub> O               | -             | 1.14×10 <sup>-8</sup> (Al <sup>3+</sup> )<br>3.75×10 <sup>-8</sup> (Zn <sup>2+</sup> ) | ICT                         | 44               |
|  | Al <sup>3+</sup> /Zn <sup>2+</sup> | Fluorimetric                 | CH <sub>3</sub> CN/H <sub>2</sub> O | yes           | 1.44×10 <sup>-5</sup> (Al <sup>3+</sup> )<br>7.40×10 <sup>-5</sup> (Zn <sup>2+</sup> ) | CHEF                        | 45               |
|  | Al <sup>3+</sup> /Zn <sup>2+</sup> | Colorimetric<br>Fluorimetric | DMSO                                | yes           | 3.65×10 <sup>-7</sup> (Al <sup>3+</sup> )<br>1.00×10 <sup>-7</sup> (Zn <sup>2+</sup> ) | CHEF, PET                   | <b>This work</b> |

## Section 2. Compound characterization

### 1. Synthesis of **1**

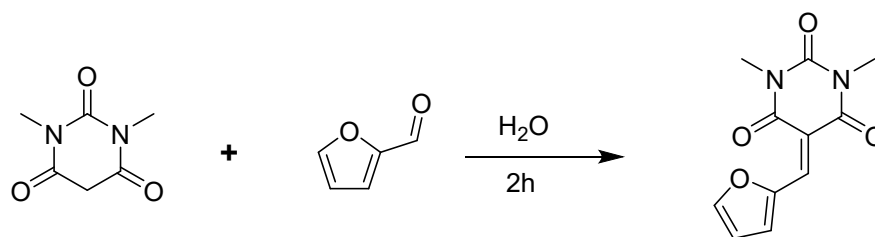

5-(furan-2-ylmethylene)-1,3-dimethylpyrimidine-2,4,6(1H,3H,5H)-trione (1.56 g, 10 mmol) and 2-furaldehyde (1.15 g, 12 mmol) were put into 40 mL water in turn. The reaction solution was churned at 298K for 2 h. Thin Layer Chromatography (TLC) was employed to monitor the reaction. And yellow precipitates were collected by vacuum filtration. The filtered product was dissolved in (60mL) dichloromethane and washed successively with 30 mL saturated aqueous NaHCO<sub>3</sub>, 30 mL H<sub>2</sub>O and 30 mL saturated aqueous NaCl. The organic layers were combined and dried with anhydrous Na<sub>2</sub>SO<sub>4</sub>. Finally, filtration and rotary evaporation gave 2.19 g (90%) of **1** as a bright yellow powder.

### 2. Synthesis of **2**

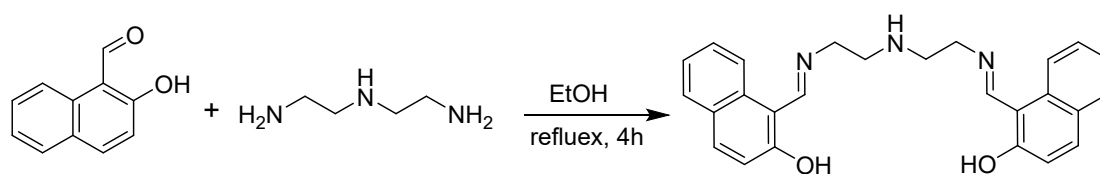

2-hydroxy naphthaldehyde (1.00 g, 5.81 mmol) was added to 40mL methanol, and the mixture was dissolved with stirring at 323K. Then diethylenetriamine (0.314 mL, 2.91 mmol) was added to the reaction solution. The reflux reaction was continued for 4h and a yellow residue was formed. The crude product was recrystallized from methanol to obtain a pure product. Yield: 82% (1.28 g).

3.  $^1\text{H}$  NMR spectra,  $^{13}\text{C}$  NMR and HRMS spectra

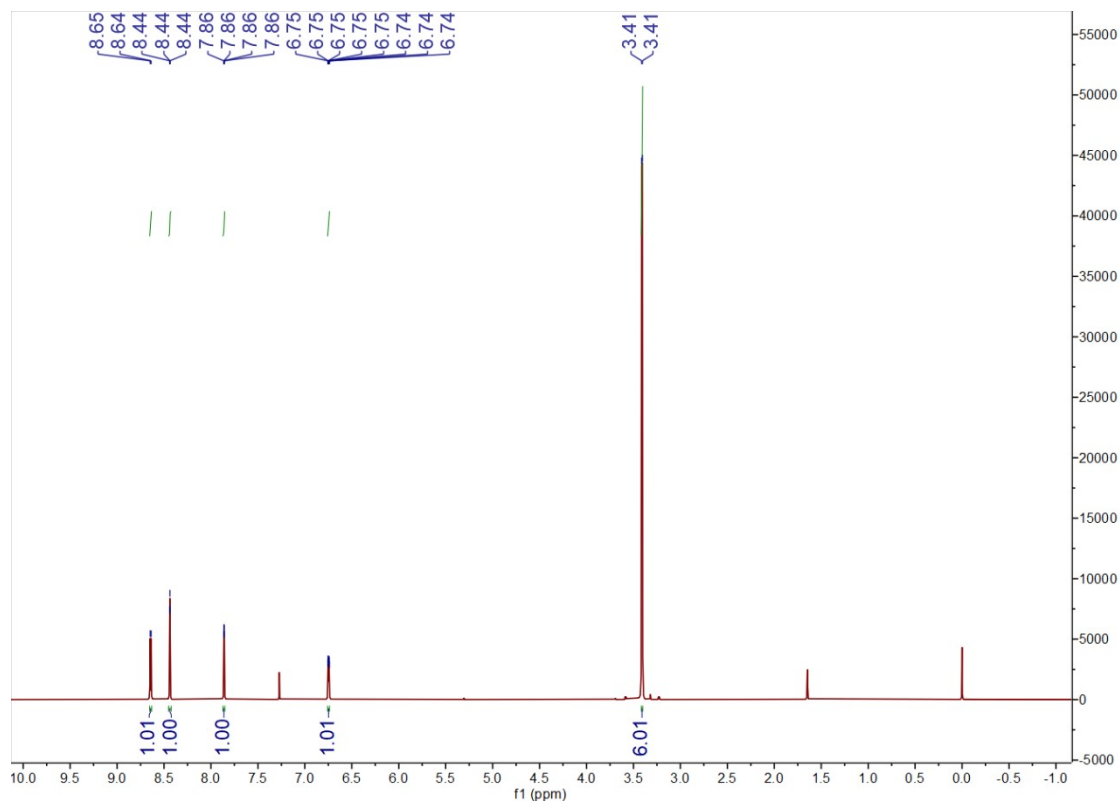

Fig. S1  $^1\text{H}$  NMR spectrum of compound 1

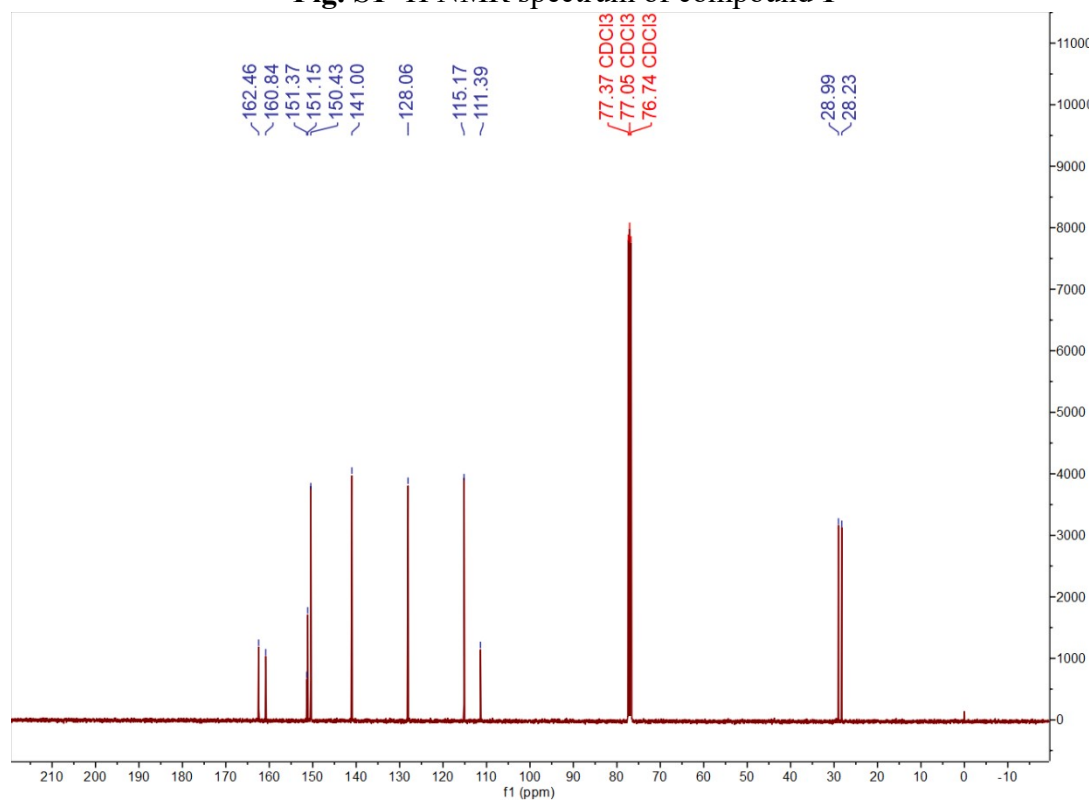

Fig. S2  $^{13}\text{C}$  NMR spectrum of compound 1

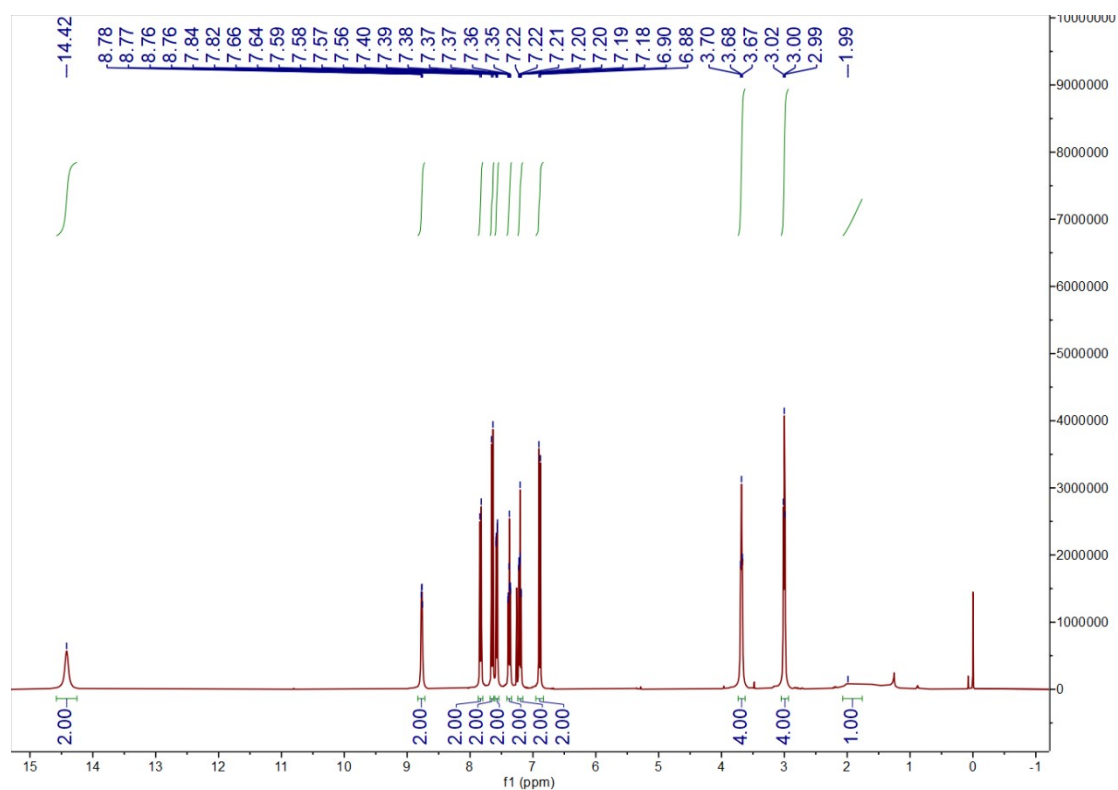

Fig. S3  $^1\text{H}$  NMR spectrum of compound 2

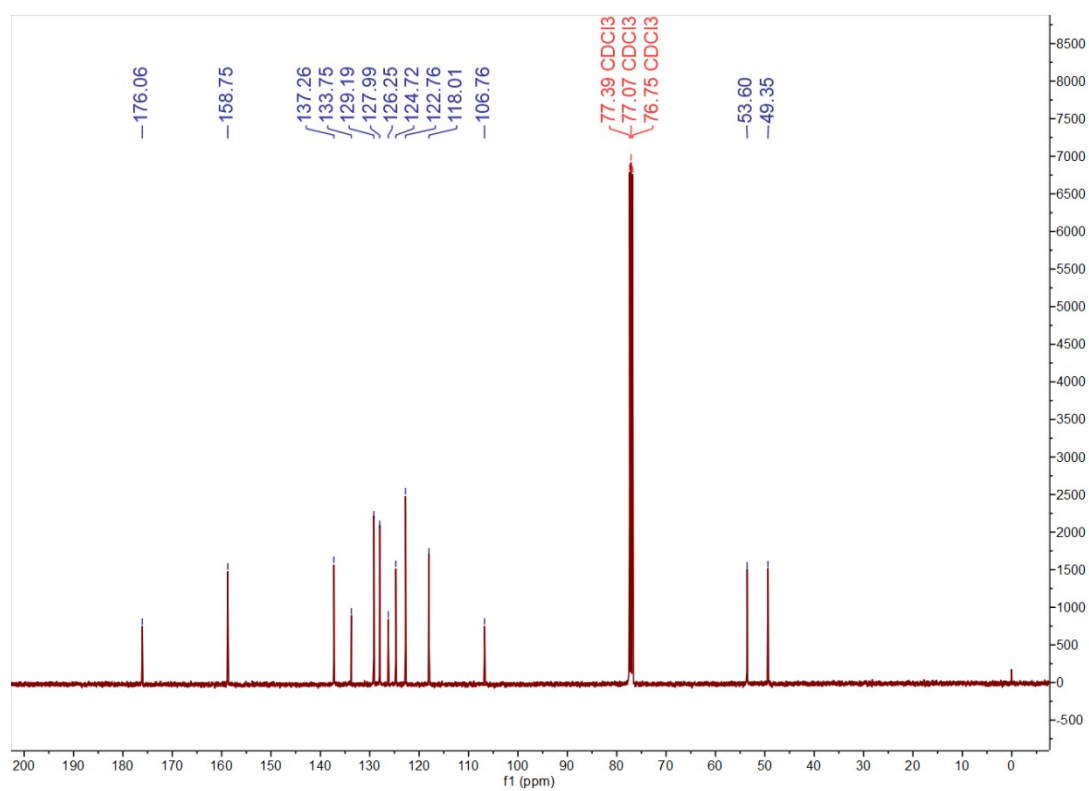

Fig. S4  $^{13}\text{C}$  NMR spectrum of compound 2

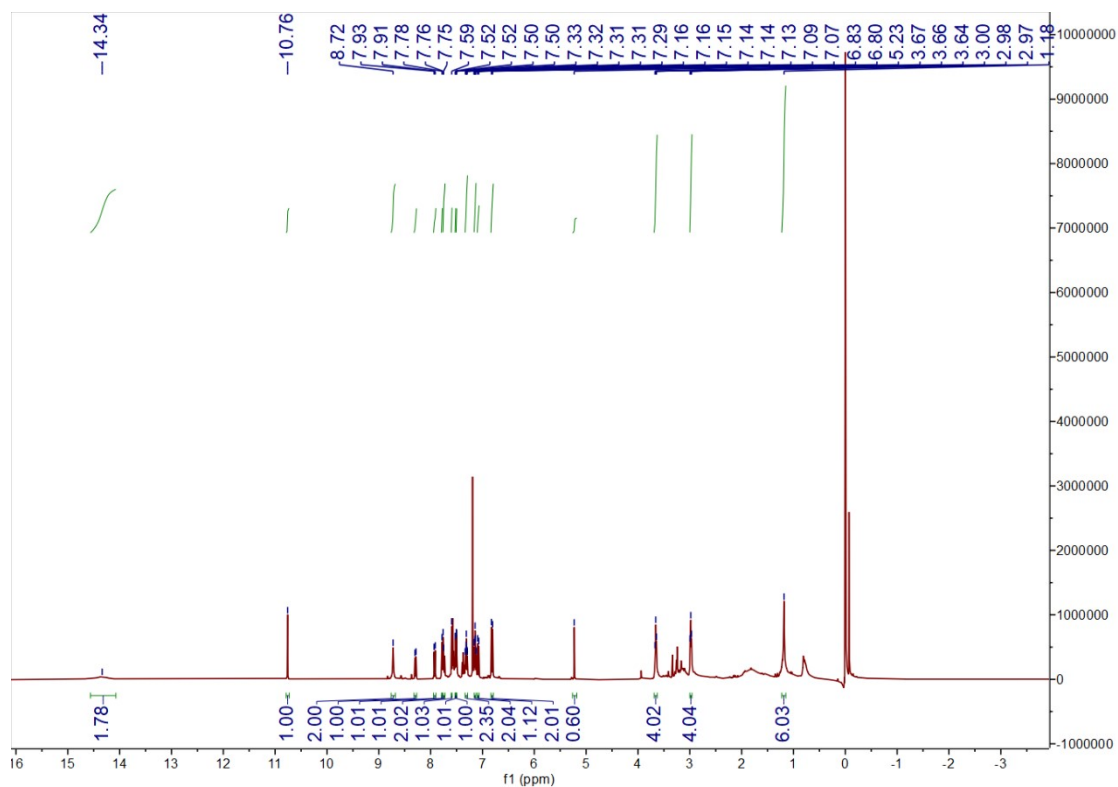

Fig. S5  $^1\text{H}$  NMR spectrum of ND-O

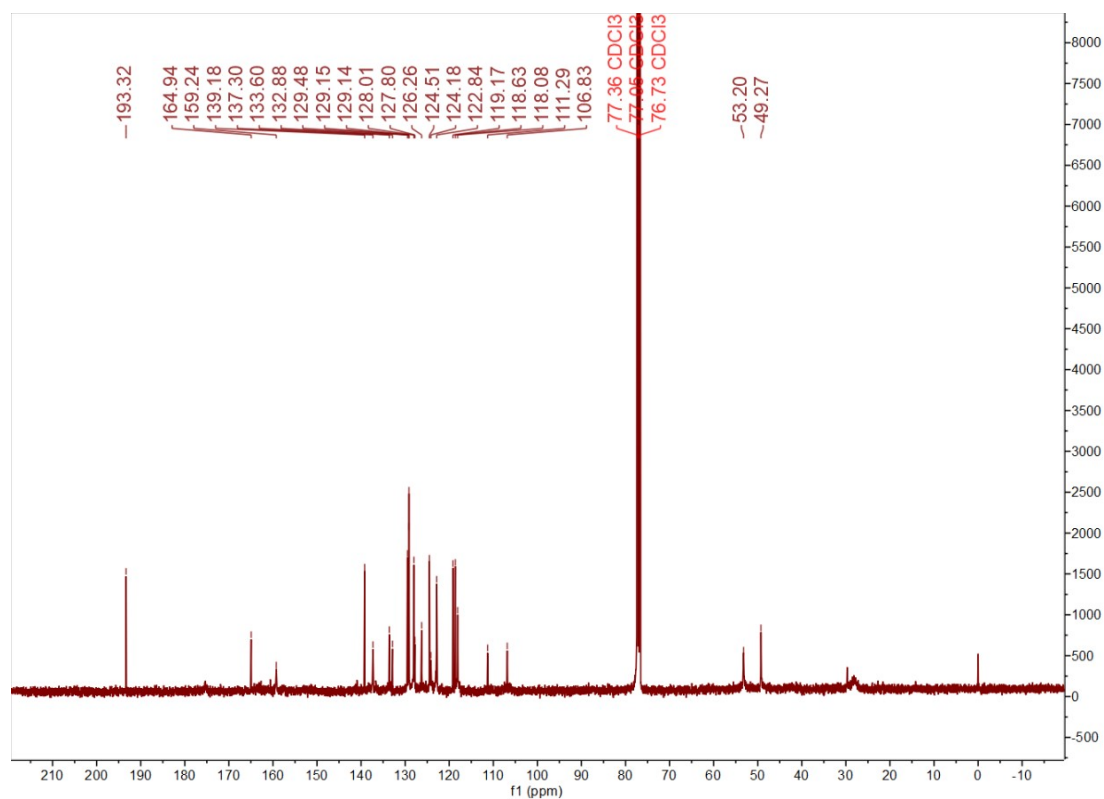

Fig. S6  $^{13}\text{C}$  NMR spectrum of ND-O

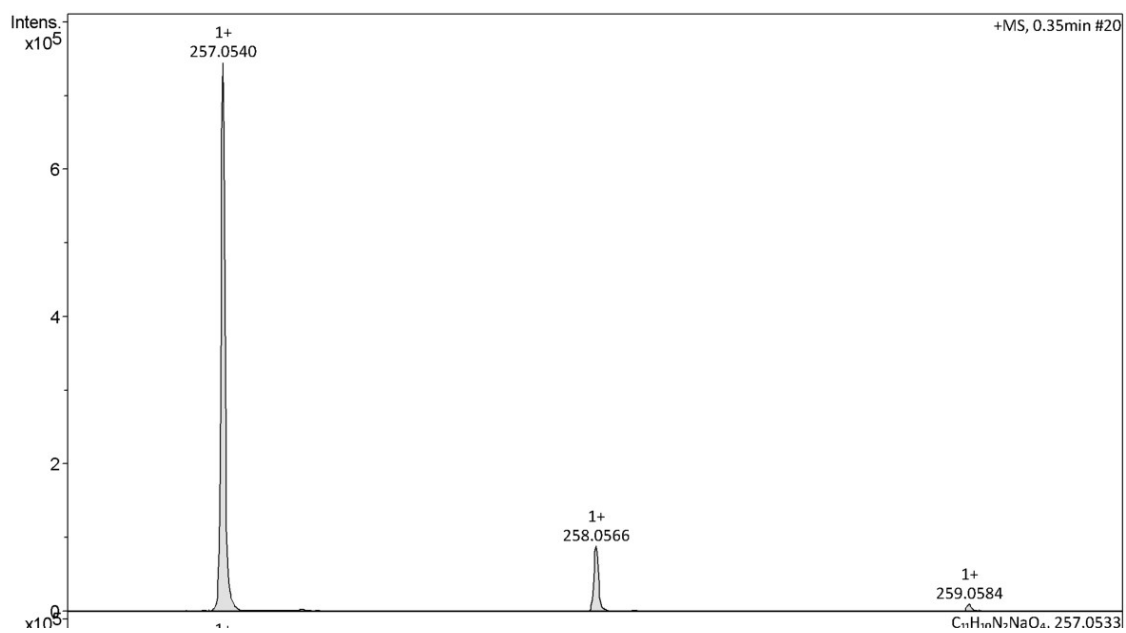

**Fig. S7** HRMS spectrum of compound **1**

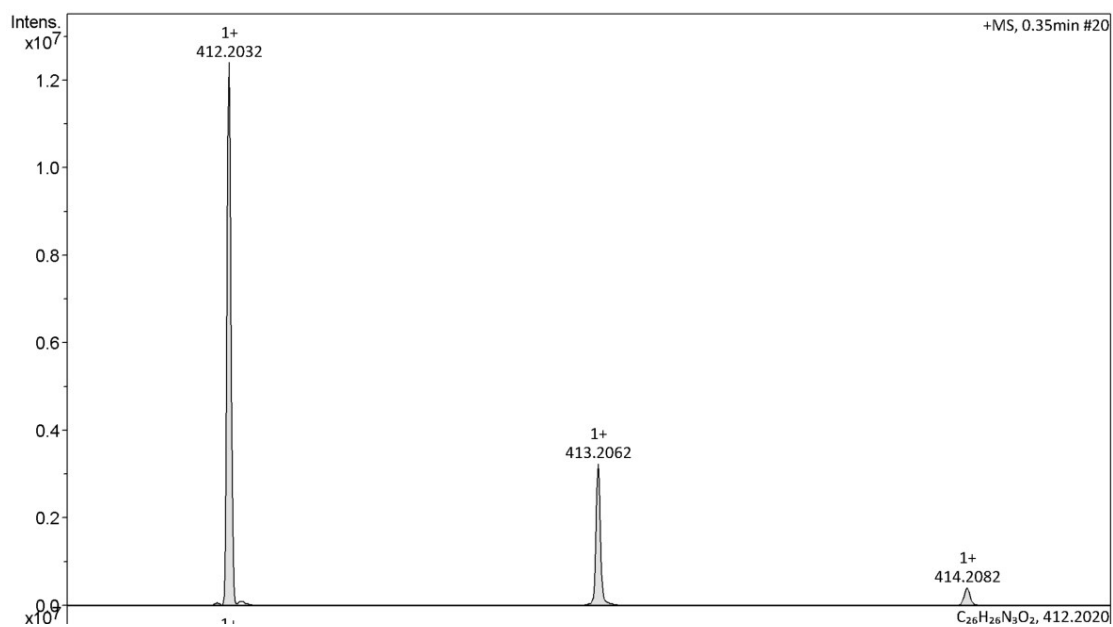

**Fig. S8** HRMS spectrum of compound **2**

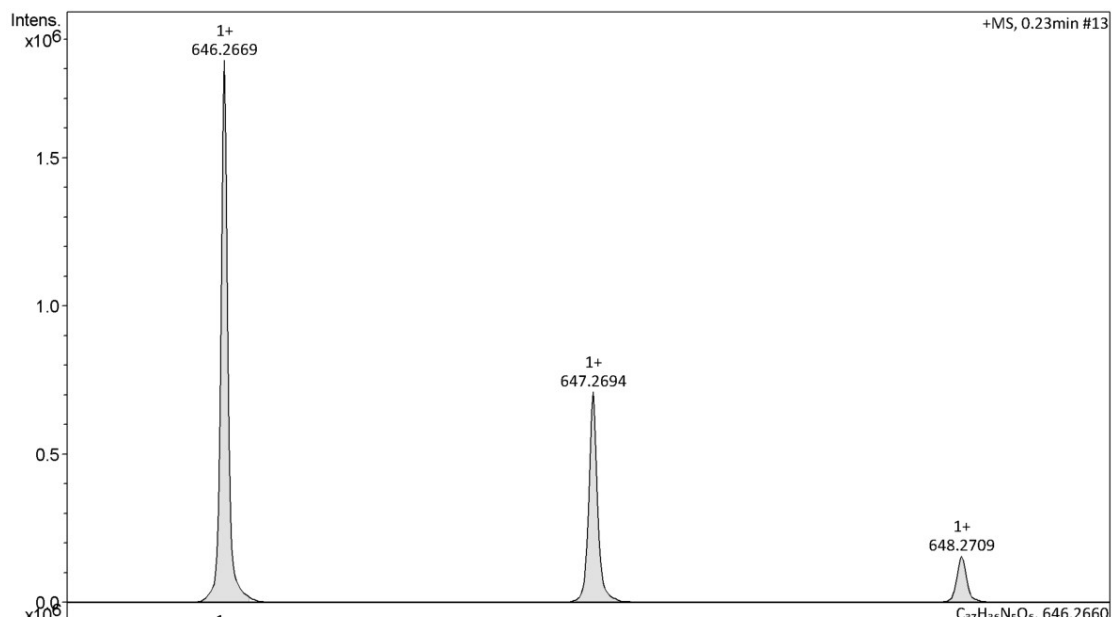

**Fig. S9** HRMS spectrum of ND-O



## Section 4. Photochromic properties study of ND-O

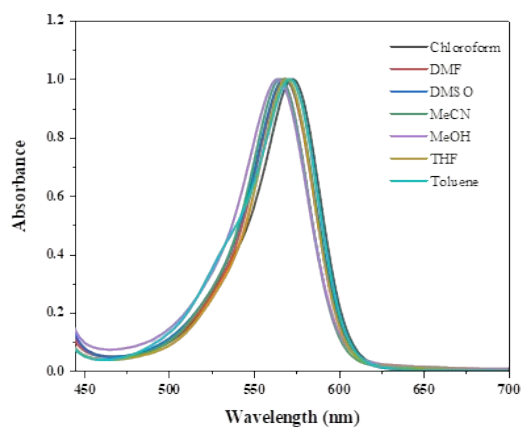

Fig. S10 The normalized UV absorption spectra of ND-O in various solvents

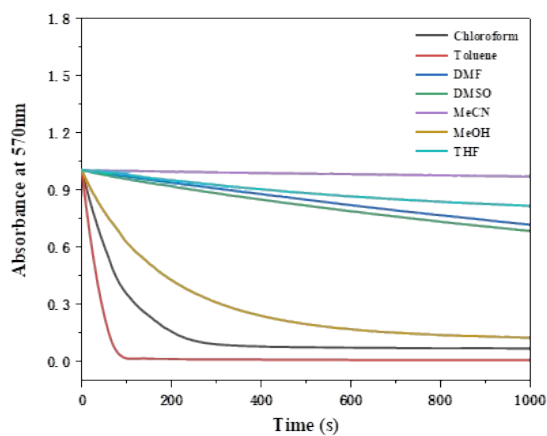

Fig. S11 The Solvent effect kinetics of ND-O in various solvents

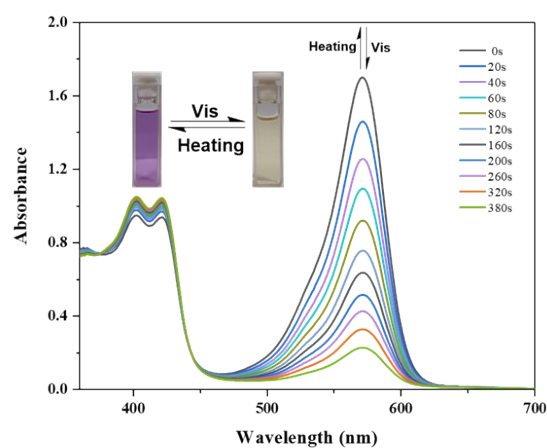

Fig. S12 The photochromism of ND-O in chloroform solution

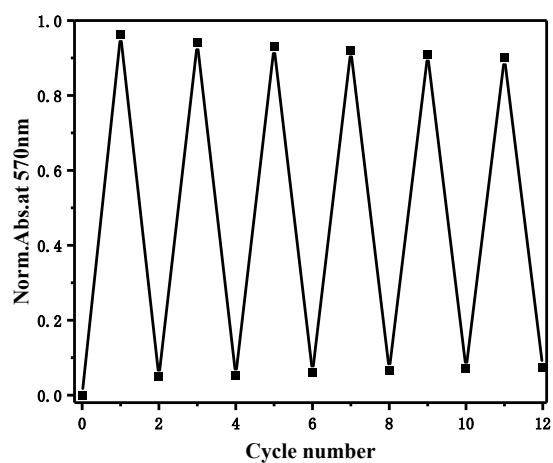

**Fig. S13** The fatigue resistance ability of ND-O

**Table S2:** Fluorescence parameters of ND-C and ND-C-Zn<sup>2+</sup>

| Solvent<br>(DMSO)     | Quantum yield<br>( $\phi$ ) | Lifetime<br>$\tau$ (ns) |
|-----------------------|-----------------------------|-------------------------|
| ND-C                  | 2.51%                       | 5.31                    |
| ND-C-Zn <sup>2+</sup> | 4.49%                       | 6.15                    |

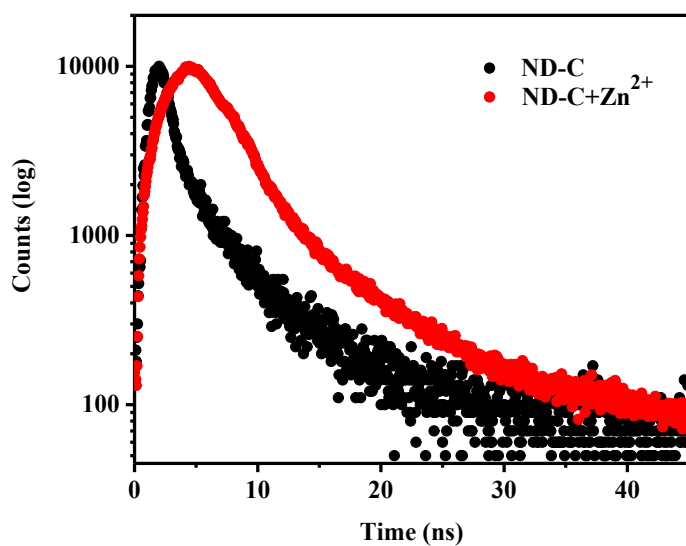

**Fig. S14** Time-resolved fluorescence decay of ND-C and ND-C-Zn<sup>2+</sup> ( $\lambda_{ex}$  = 380 nm)

**Section 3. Colorimetric detection of  $\text{Al}^{3+}$  and fluorescence response of  $\text{Zn}^{2+}$**

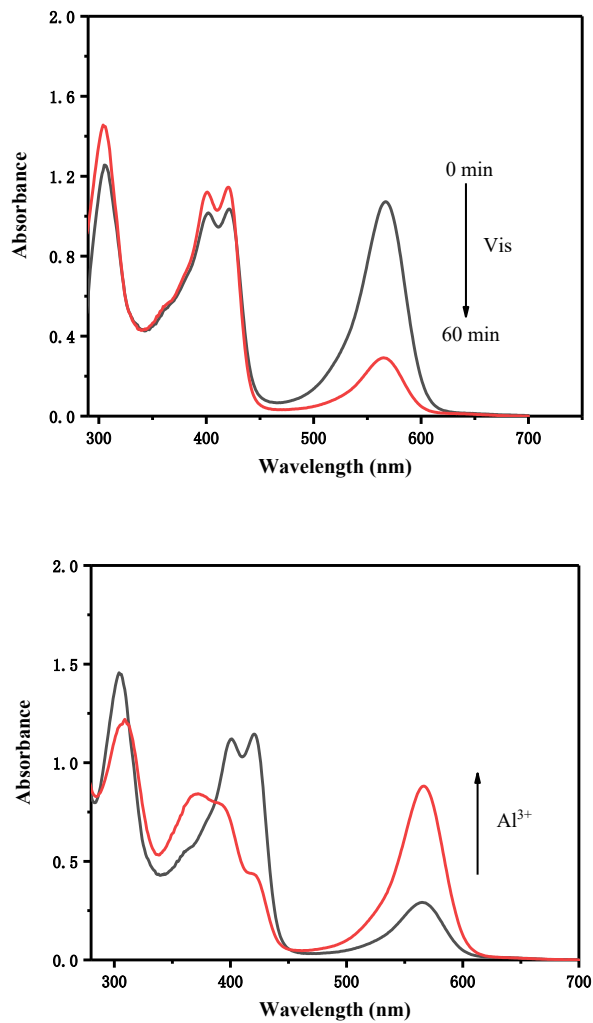

**Fig. S15** The UV absorption spectra of visible light and aluminum ion added in DMF ([ND-C] = 0.1 mM)

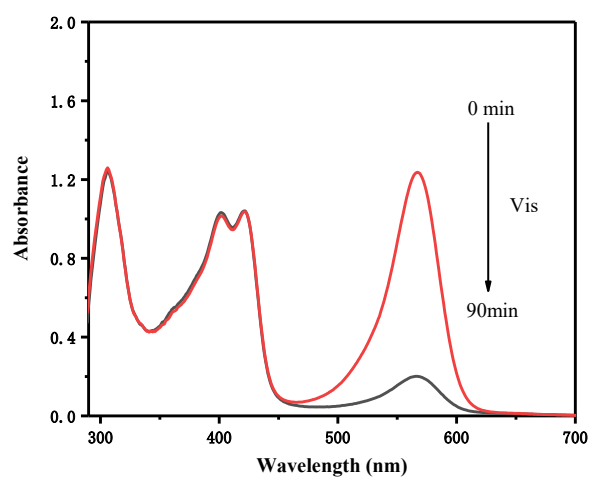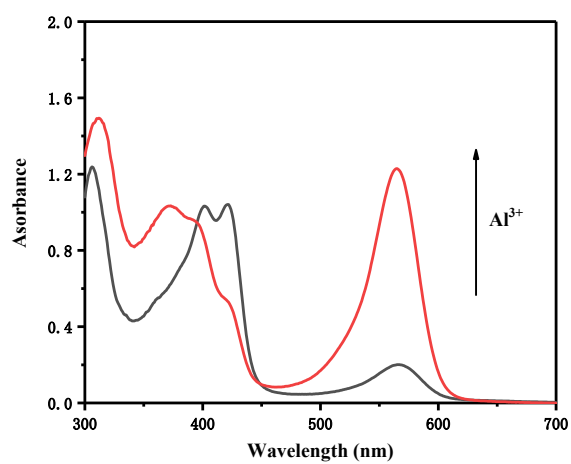

**Fig. S16** The UV absorption spectra of visible light and aluminum ion added in DMSO ( $[ND-C] = 0.1 \text{ mM}$ )

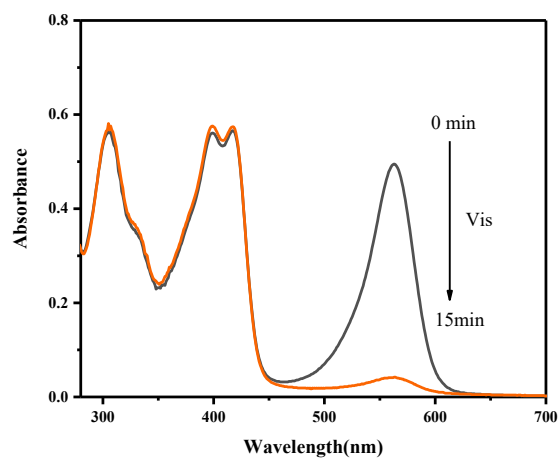

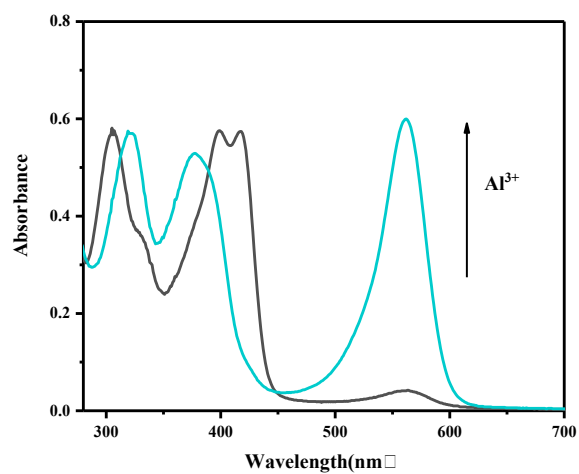

**Fig. S17** The UV absorption spectra of visible light and aluminum ion added in methanol ( $[\text{ND-C}] = 0.1 \text{ mM}$ )

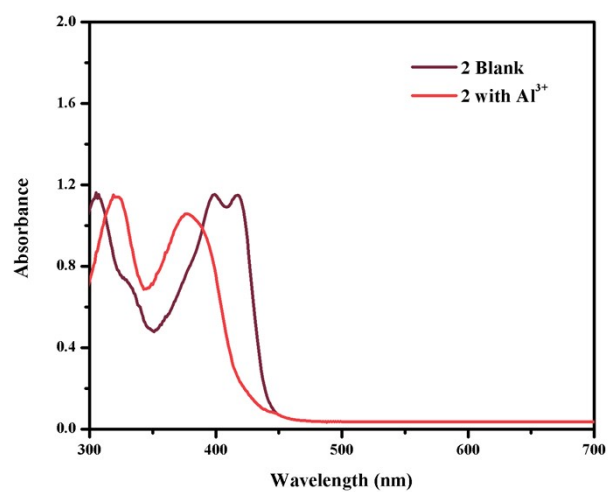

**Fig. S18** The UV absorption spectra of **2** ( $20.0 \mu\text{M}$ ) and in presence of  $4\text{eq. Al}^{3+}$

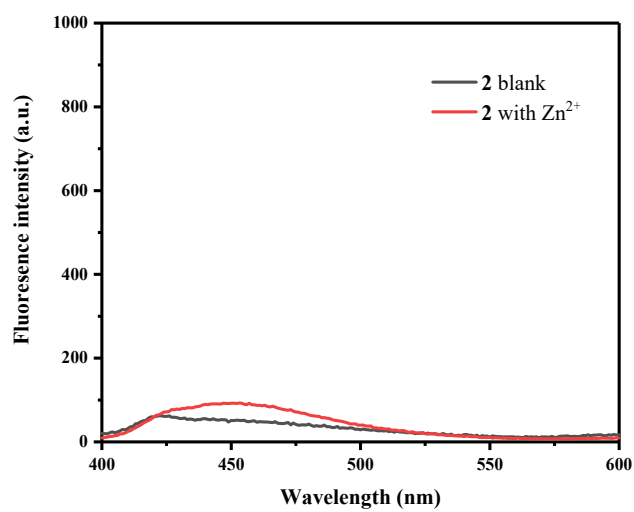

**Fig. S19** Fluorescence spectra of **2** (20.0  $\mu\text{M}$ ) and in presence of 4eq.  $\text{Zn}^{2+}$

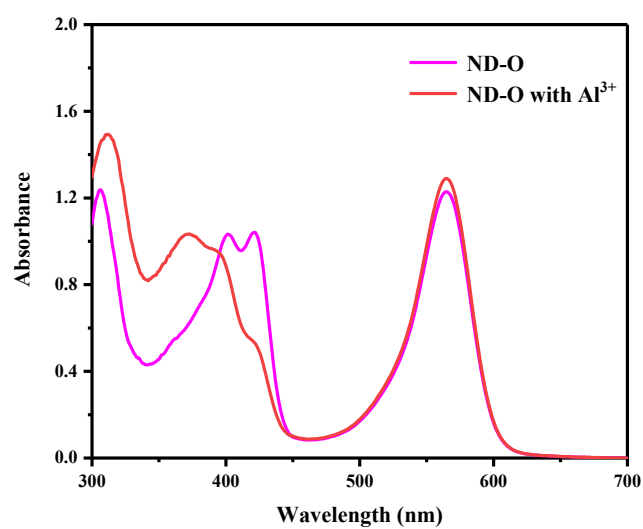

**Fig. S20** The UV absorption spectra of **ND-O** (20.0  $\mu\text{M}$ ) and in presence of 4eq.  $\text{Al}^{3+}$

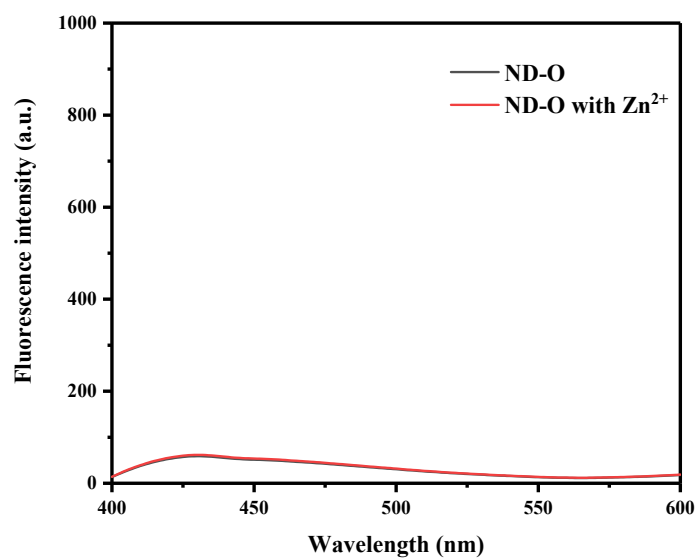

**Fig. S21** Fluorescence spectra of **ND-O** (20.0  $\mu\text{M}$ ) and in presence of 4eq.  $\text{Zn}^{2+}$

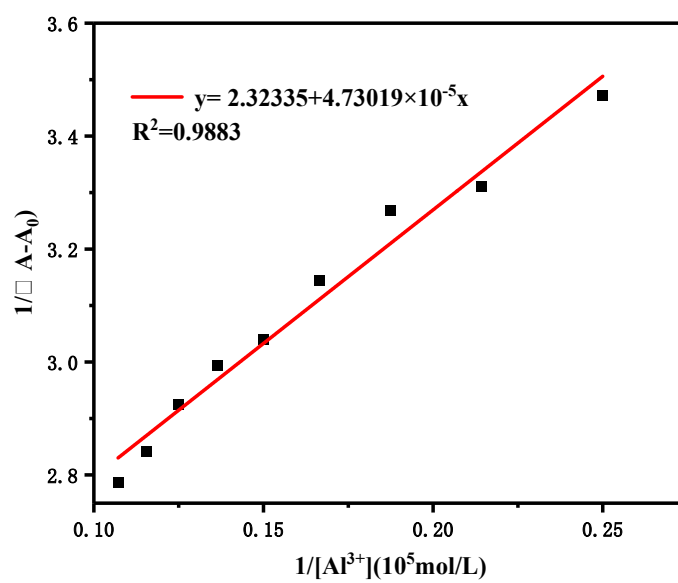

**Fig. S22** Benesi–Hildebrand plot for calculation of binding constant between **ND-C** and  $\text{Al}^{3+}$ .

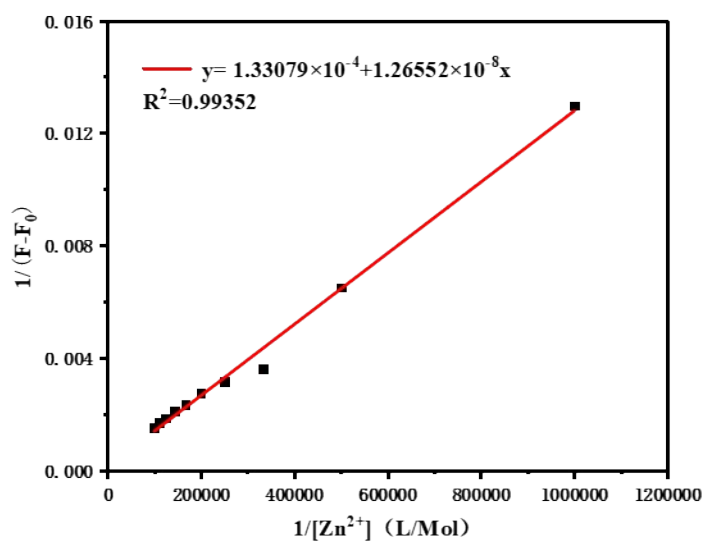

**Fig. S23** Benesi-Hildebrand plot based on fluorescence intensity of ND-C with added  $Zn^{2+}$  concentrations in DMSO.

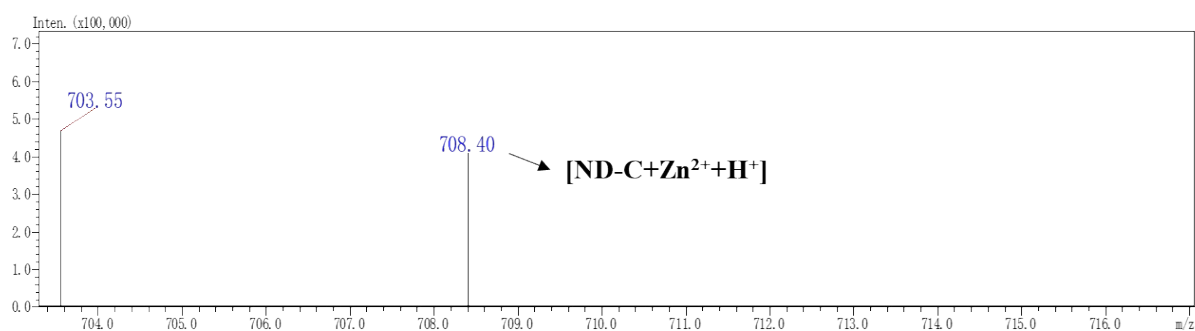

**Fig. S24** ESI-MS spectra of ND-C+ $Zn^{2+}$

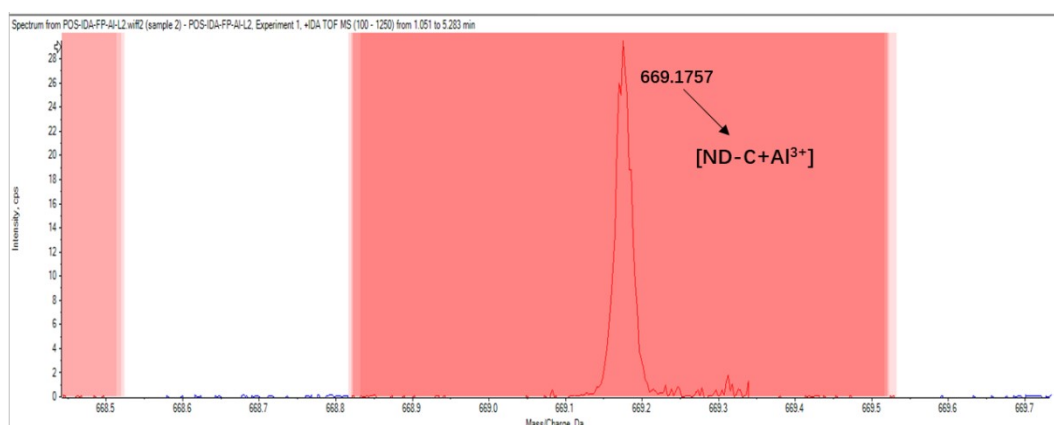

**Fig. S25** HRMS spectra of ND-C+ $Al^{3+}$



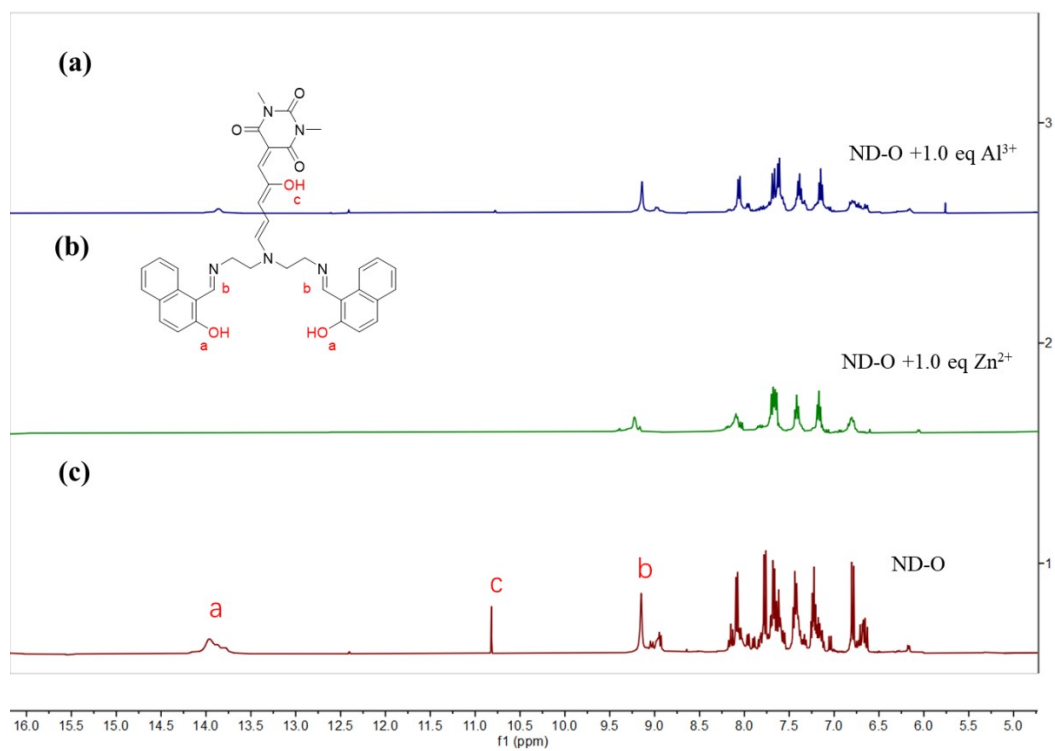

**Fig. S26** <sup>1</sup>H NMR spectra in DMSO-d<sub>6</sub> of (a) **ND-O** in presence of 1.0 eq. Al<sup>3+</sup>; (b) **ND-O** in presence of 1.0 eq. Zn<sup>2+</sup>; (c) **ND-O**.

## Section 5. Crystal data and structure refinement for 1 and 2

### 5.1 Experimental

Single crystals of  $C_{11}H_{10}N_2O_4$ (**1**) and  $C_{26}H_{26}N_3O_2$ (**2**) were measured. the suitable crystal of  $C_{11}H_{10}N_2O_4$ (**1**) and  $C_{26}H_{26}N_3O_2$ (**2**) was selected and measured on a XtaLAB Synergy R, HyPix diffractometer. The crystal was kept at 169.99(11) K during data collection. Using Olex2 [1], the structure was solved with the SHELXT [2] structure solution program using Intrinsic Phasing and refined with the SHELXL [3] refinement package using Least Squares minimisation.

[1] Dolomanov, O.V., Bourhis, L.J., Gildea, R.J, Howard, J.A.K. & Puschmann, H. (2009), *J. Appl. Cryst.* 42, 339-341.

[2] Sheldrick, G.M. (2015). *Acta Cryst.* A71, 3-8.

[3] Sheldrick, G.M. (2015). *Acta Cryst.* C71, 3-8.

### 5.2 Structures of crystal 1

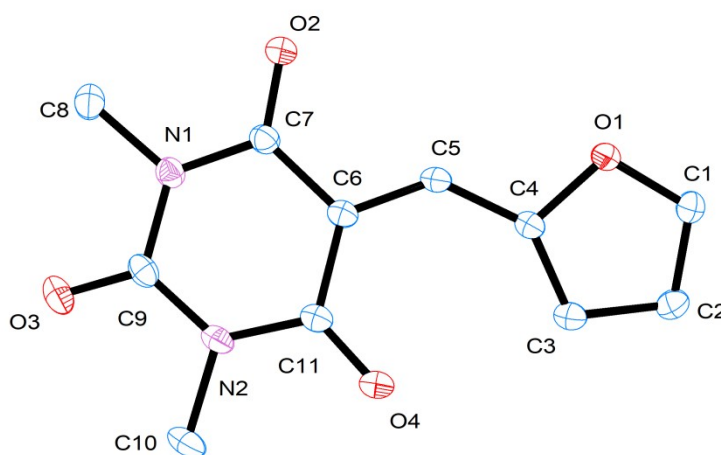

**Fig. S27** ORTEP drawings for compound **1**, thermal ellipsoids are drawn at the 30% probability level, and H atoms are omitted for clarity.

### 5.3 Crystal data and structure refinement for 1

Single crystal 1 CCDC number: 2110023

**Table S3 Crystal data and structure refinement for 1.**

---

|                                             |                                                               |
|---------------------------------------------|---------------------------------------------------------------|
| Identification code                         | 1                                                             |
| Empirical formula                           | C <sub>11</sub> H <sub>10</sub> N <sub>2</sub> O <sub>4</sub> |
| Formula weight                              | 234.21                                                        |
| Temperature/K                               | 169.99(11)                                                    |
| Crystal system                              | monoclinic                                                    |
| Space group                                 | P2 <sub>1</sub> /n                                            |
| a/Å                                         | 12.8240(3)                                                    |
| b/Å                                         | 6.1616(2)                                                     |
| c/Å                                         | 13.2002(3)                                                    |
| α/°                                         | 90                                                            |
| β/°                                         | 99.354(2)                                                     |
| γ/°                                         | 90                                                            |
| Volume/Å <sup>3</sup>                       | 1029.16(5)                                                    |
| Z                                           | 4                                                             |
| ρ <sub>calc</sub> /g/cm <sup>3</sup>        | 1.512                                                         |
| μ/mm <sup>-1</sup>                          | 0.994                                                         |
| F(000)                                      | 488.0                                                         |
| Crystal size/mm <sup>3</sup>                | 0.15 × 0.1 × 0.05                                             |
| Radiation                                   | Cu Kα (λ = 1.54184)                                           |
| 2θ range for data collection/°              | 8.916 to 149.606                                              |
| Index ranges                                | -15 ≤ h ≤ 16, -7 ≤ k ≤ 7, -16 ≤ l ≤ 13                        |
| Reflections collected                       | 6441                                                          |
| Independent reflections                     | 2025 [R <sub>int</sub> = 0.0257, R <sub>sigma</sub> = 0.0279] |
| Data/restraints/parameters                  | 2025/0/156                                                    |
| Goodness-of-fit on F <sup>2</sup>           | 1.047                                                         |
| Final R indexes [I ≥ 2σ (I)]                | R <sub>1</sub> = 0.0419, wR <sub>2</sub> = 0.1101             |
| Final R indexes [all data]                  | R <sub>1</sub> = 0.0454, wR <sub>2</sub> = 0.1132             |
| Largest diff. peak/hole / e Å <sup>-3</sup> | 0.21/-0.26                                                    |

---

**Table S4 Fractional Atomic Coordinates ( $\times 10^4$ ) and Equivalent Isotropic Displacement Parameters ( $\text{\AA}^2 \times 10^3$ ) for 1.  $U_{\text{eq}}$  is defined as 1/3 of of the trace of the orthogonalised  $U_{\text{IJ}}$  tensor.**

| Atom | $x$        | $y$         | $z$        | $U(\text{eq})$ |
|------|------------|-------------|------------|----------------|
| O1   | 3822.7(8)  | -186.9(17)  | 4345.1(8)  | 33.0(3)        |
| O3   | 2563.4(9)  | 10397.1(18) | 7013.3(9)  | 41.3(3)        |
| O2   | 5003.7(8)  | 5271(2)     | 6688.8(9)  | 43.0(3)        |
| O4   | 1513.4(8)  | 4803.4(19)  | 4878.1(9)  | 42.4(3)        |
| N1   | 3813.3(9)  | 7913(2)     | 6798.5(9)  | 29.4(3)        |
| N2   | 2057.8(9)  | 7666(2)     | 5899.8(9)  | 30.8(3)        |
| C5   | 3647.0(10) | 3033(2)     | 5230.2(10) | 26.7(3)        |
| C6   | 3317.3(10) | 4862(2)     | 5657.8(10) | 27.0(3)        |
| C4   | 3153.8(10) | 1521(2)     | 4489.2(10) | 26.4(3)        |
| C3   | 2218.6(11) | 1222(2)     | 3837.2(11) | 30.4(3)        |
| C11  | 2235.5(11) | 5713(2)     | 5434.6(11) | 29.3(3)        |
| C7   | 4111.1(11) | 5982(2)     | 6411.5(11) | 29.4(3)        |
| C9   | 2793.6(11) | 8755(2)     | 6600.4(11) | 30.1(3)        |
| C1   | 3288.6(12) | -1490(2)    | 3618.3(11) | 33.1(3)        |
| C2   | 2310.0(11) | -700(3)     | 3279.5(11) | 32.8(3)        |
| C8   | 4557.6(13) | 9052(3)     | 7577.2(13) | 41.5(4)        |
| C10  | 992.6(12)  | 8599(3)     | 5708.0(13) | 41.7(4)        |

**Table S5 Anisotropic Displacement Parameters ( $\text{\AA}^2 \times 10^3$ ) for 1. The Anisotropic displacement factor exponent takes the form:  $-2\pi^2[h^2a^{*2}U_{11}+2hka^*b^*U_{12}+\dots]$ .**

| Atom | $U_{11}$ | $U_{22}$ | $U_{33}$ | $U_{23}$ | $U_{13}$ | $U_{12}$ |
|------|----------|----------|----------|----------|----------|----------|
| O1   | 27.8(5)  | 34.9(6)  | 34.3(5)  | -8.0(4)  | -0.9(4)  | 7.3(4)   |
| O3   | 49.2(7)  | 34.2(6)  | 42.6(6)  | -4.6(5)  | 14.2(5)  | 10.9(5)  |
| O2   | 28.2(6)  | 44.9(7)  | 52.3(7)  | -16.1(5) | -4.2(5)  | 8.9(5)   |
| O4   | 24.9(5)  | 45.2(7)  | 55.0(7)  | -9.6(5)  | 0.0(5)   | 6.2(4)   |
| N1   | 28.8(6)  | 29.6(6)  | 31.2(6)  | -1.7(5)  | 8.8(5)   | 0.9(5)   |
| N2   | 27.8(6)  | 34.7(7)  | 30.7(6)  | 3.8(5)   | 7.0(5)   | 10.8(5)  |
| C5   | 21.1(6)  | 31.3(7)  | 27.3(7)  | 2.3(6)   | 2.8(5)   | 3.9(5)   |
| C6   | 23.9(7)  | 29.7(7)  | 28.1(7)  | 2.3(5)   | 6.0(5)   | 2.7(5)   |
| C4   | 25.3(6)  | 28.6(7)  | 25.9(6)  | 2.3(5)   | 5.5(5)   | 4.7(5)   |
| C3   | 26.1(7)  | 34.8(8)  | 29.9(7)  | 3.0(6)   | 3.5(5)   | 3.8(6)   |
| C11  | 25.3(7)  | 33.2(7)  | 30.1(7)  | 3.1(6)   | 6.3(5)   | 4.1(6)   |
| C7   | 26.9(7)  | 31.9(7)  | 30.1(7)  | -0.7(6)  | 6.7(5)   | 2.8(6)   |
| C9   | 35.5(8)  | 28.7(7)  | 28.4(7)  | 3.3(5)   | 12.7(6)  | 5.9(6)   |
| C1   | 35.0(7)  | 32.6(7)  | 30.7(7)  | -7.2(6)  | 1.8(6)   | 1.8(6)   |
| C2   | 30.6(7)  | 37.6(8)  | 28.5(7)  | -1.1(6)  | -0.4(5)  | -1.7(6)  |
| C8   | 38.4(8)  | 40.6(9)  | 45.5(9)  | -14.0(7) | 6.7(7)   | -1.4(7)  |
| C10  | 33.0(8)  | 44.9(9)  | 48.1(9)  | 4.7(7)   | 9.0(7)   | 18.1(7)  |

**Table S6 Bond Lengths for 1.**

| Atom | Atom | Length/Å   | Atom | Atom | Length/Å   |
|------|------|------------|------|------|------------|
| O1   | C4   | 1.3903(17) | N2   | C9   | 1.383(2)   |
| O1   | C1   | 1.3493(17) | N2   | C10  | 1.4656(18) |
| O3   | C9   | 1.2084(18) | C5   | C6   | 1.3581(19) |
| O2   | C7   | 1.2248(18) | C5   | C4   | 1.4225(19) |
| O4   | C11  | 1.2208(18) | C6   | C11  | 1.4675(18) |
| N1   | C7   | 1.3732(18) | C6   | C7   | 1.474(2)   |
| N1   | C9   | 1.3915(18) | C4   | C3   | 1.3703(19) |
| N1   | C8   | 1.4632(19) | C3   | C2   | 1.409(2)   |
| N2   | C11  | 1.3865(19) | C1   | C2   | 1.353(2)   |

**Table S7 Bond Angles for 1.**

| Atom | Atom | Atom | Angle/°    | Atom | Atom | Atom | Angle/°    |
|------|------|------|------------|------|------|------|------------|
| C1   | O1   | C4   | 107.13(11) | C3   | C4   | C5   | 140.01(13) |
| C7   | N1   | C9   | 124.25(12) | C4   | C3   | C2   | 107.63(12) |
| C7   | N1   | C8   | 119.19(12) | O4   | C11  | N2   | 120.12(12) |
| C9   | N1   | C8   | 116.04(12) | O4   | C11  | C6   | 123.82(13) |
| C11  | N2   | C10  | 118.65(13) | N2   | C11  | C6   | 116.06(13) |
| C9   | N2   | C11  | 125.02(12) | O2   | C7   | N1   | 120.11(13) |
| C9   | N2   | C10  | 116.16(13) | O2   | C7   | C6   | 122.93(13) |
| C6   | C5   | C4   | 134.06(12) | N1   | C7   | C6   | 116.96(12) |
| C5   | C6   | C11  | 124.13(13) | O3   | C9   | N1   | 121.22(14) |
| C5   | C6   | C7   | 116.19(12) | O3   | C9   | N2   | 121.18(13) |
| C11  | C6   | C7   | 119.65(12) | N2   | C9   | N1   | 117.59(12) |
| O1   | C4   | C5   | 112.00(11) | O1   | C1   | C2   | 110.94(13) |
| C3   | C4   | O1   | 107.97(12) | C1   | C2   | C3   | 106.33(13) |

**Table S8 Torsion Angles for 1.**

| <b>A</b> | <b>B</b> | <b>C</b> | <b>D</b> | <b>Angle/°</b> | <b>A</b> | <b>B</b> | <b>C</b> | <b>D</b> | <b>Angle/°</b> |
|----------|----------|----------|----------|----------------|----------|----------|----------|----------|----------------|
| O1       | C4       | C3       | C2       | -0.09(15)      | C7       | N1       | C9       | N2       | -5.8(2)        |
| O1       | C1       | C2       | C3       | -0.53(17)      | C7       | C6       | C11      | O4       | -174.61(14)    |
| C5       | C6       | C11      | O4       | 3.5(2)         | C7       | C6       | C11      | N2       | 5.30(19)       |
| C5       | C6       | C11      | N2       | -176.55(12)    | C9       | N1       | C7       | O2       | -174.12(14)    |
| C5       | C6       | C7       | O2       | -3.8(2)        | C9       | N1       | C7       | C6       | 6.4(2)         |
| C5       | C6       | C7       | N1       | 175.63(12)     | C9       | N2       | C11      | O4       | 175.04(13)     |
| C5       | C4       | C3       | C2       | 177.82(17)     | C9       | N2       | C11      | C6       | -4.9(2)        |
| C6       | C5       | C4       | O1       | -176.64(14)    | C1       | O1       | C4       | C5       | -178.78(12)    |
| C6       | C5       | C4       | C3       | 5.5(3)         | C1       | O1       | C4       | C3       | -0.23(15)      |
| C4       | O1       | C1       | C2       | 0.48(16)       | C8       | N1       | C7       | O2       | -2.8(2)        |
| C4       | C5       | C6       | C11      | 2.3(2)         | C8       | N1       | C7       | C6       | 177.77(12)     |
| C4       | C5       | C6       | C7       | -179.46(14)    | C8       | N1       | C9       | O3       | 3.8(2)         |
| C4       | C3       | C2       | C1       | 0.37(17)       | C8       | N1       | C9       | N2       | -177.37(12)    |
| C11      | N2       | C9       | O3       | -176.19(13)    | C10      | N2       | C11      | O4       | 0.0(2)         |
| C11      | N2       | C9       | N1       | 5.0(2)         | C10      | N2       | C11      | C6       | -179.92(12)    |
| C11      | C6       | C7       | O2       | 174.46(14)     | C10      | N2       | C9       | O3       | -1.0(2)        |
| C11      | C6       | C7       | N1       | -6.07(19)      | C10      | N2       | C9       | N1       | -179.89(12)    |
| C7       | N1       | C9       | O3       | 175.39(13)     |          |          |          |          |                |



**Table S9 Hydrogen Atom Coordinates ( $\text{\AA} \times 10^4$ ) and Isotropic Displacement**

**Parameters ( $\text{\AA}^2 \times 10^3$ ) for 1.**

| Atom | <i>x</i> | <i>y</i> | <i>z</i> | U(eq) |
|------|----------|----------|----------|-------|
| H5   | 4349.39  | 2695.42  | 5475.76  | 32    |
| H3   | 1630.02  | 2123.19  | 3774.12  | 36    |
| H1   | 3557.45  | -2761.54 | 3381.99  | 40    |
| H2   | 1799.14  | -1304.51 | 2778.16  | 39    |
| H8A  | 4384.55  | 8760.1   | 8244.72  | 62    |
| H8B  | 4513.89  | 10584.47 | 7446.69  | 62    |
| H8C  | 5262.66  | 8557.68  | 7550.93  | 62    |
| H10A | 1024.92  | 10047.83 | 5447.55  | 63    |
| H10B | 708.66   | 8634.25  | 6337.37  | 63    |
| H10C | 546.51   | 7725.64  | 5213.41  | 63    |

#### 5.4 Structures of crystal 2

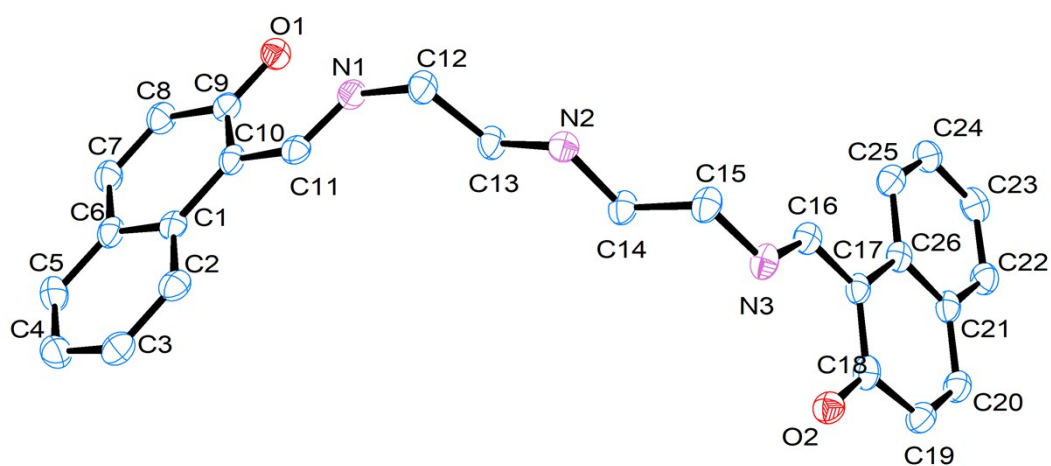

**Fig. S28** ORTEP drawings for compound 2, thermal ellipsoids are drawn at the 30% probability level, and H atoms are omitted for clarity.

## 5.5 Crystal data and structure refinement for 2.

Single crystal 2 CCDC number: 2110020

**Table S10 Crystal data and structure refinement for 2**

---

|                                             |                                                                |
|---------------------------------------------|----------------------------------------------------------------|
| Identification code                         | 2                                                              |
| Empirical formula                           | C <sub>26</sub> H <sub>26</sub> N <sub>3</sub> O <sub>2</sub>  |
| Formula weight                              | 412.50                                                         |
| Temperature/K                               | 169.99(13)                                                     |
| Crystal system                              | monoclinic                                                     |
| Space group                                 | C2                                                             |
| a/Å                                         | 37.4048(8)                                                     |
| b/Å                                         | 4.46170(10)                                                    |
| c/Å                                         | 15.4153(4)                                                     |
| $\alpha$ /°                                 | 90                                                             |
| $\beta$ /°                                  | 96.692(2)                                                      |
| $\gamma$ /°                                 | 90                                                             |
| Volume/Å <sup>3</sup>                       | 2555.12(10)                                                    |
| Z                                           | 4                                                              |
| $\rho_{\text{calc}}$ /cm <sup>3</sup>       | 1.072                                                          |
| $\mu$ /mm <sup>-1</sup>                     | 0.545                                                          |
| F(000)                                      | 876.0                                                          |
| Crystal size/mm <sup>3</sup>                | 0.15 × 0.1 × 0.06                                              |
| Radiation                                   | Cu K $\alpha$ ( $\lambda$ = 1.54184)                           |
| 2 $\Theta$ range for data collection/°      | 4.758 to 150.212                                               |
| Index ranges                                | -45 ≤ h ≤ 46, -5 ≤ k ≤ 4, -19 ≤ l ≤ 19                         |
| Reflections collected                       | 16644                                                          |
| Independent reflections                     | 4549 [ $R_{\text{int}}$ = 0.0296, $R_{\text{sigma}}$ = 0.0255] |
| Data/restraints/parameters                  | 4549/1/281                                                     |
| Goodness-of-fit on F <sup>2</sup>           | 1.075                                                          |
| Final R indexes [ $I \geq 2\sigma(I)$ ]     | $R_1 = 0.0769$ , $wR_2 = 0.2305$                               |
| Final R indexes [all data]                  | $R_1 = 0.0817$ , $wR_2 = 0.2360$                               |
| Largest diff. peak/hole / e Å <sup>-3</sup> | 0.39/-0.29                                                     |
| Flack parameter                             | 0.30(13)                                                       |

---

**Table S11 Fractional Atomic Coordinates ( $\times 10^4$ ) and Equivalent Isotropic Displacement Parameters ( $\text{\AA}^2 \times 10^3$ ) for 2.  $U_{\text{eq}}$  is defined as 1/3 of of the trace of the orthogonalised  $U_{\text{IJ}}$  tensor.**

| Atom | <i>x</i>   | <i>y</i>  | <i>z</i> | $U(\text{eq})$ |
|------|------------|-----------|----------|----------------|
| O1   | 3836.8(8)  | -4544(9)  | 1997(2)  | 45.4(8)        |
| O002 | 6148.5(10) | 14660(10) | 3206(2)  | 53.4(9)        |
| N2   | 5000       | -9731(13) | 0        | 38.7(11)       |
| N1   | 4128.1(10) | -7782(10) | 841(3)   | 44.2(9)        |
| N006 | 5900.3(11) | 17883(10) | 4351(3)  | 46.5(10)       |
| N00A | 5000       | 19847(16) | 5000     | 48.4(14)       |
| C00B | 6689.9(12) | 13463(13) | 5342(3)  | 42.4(11)       |
| C00C | 6411.9(12) | 14611(12) | 4679(3)  | 39.9(10)       |
| C10  | 3612.7(11) | -4677(11) | 486(3)   | 38.0(10)       |
| C1   | 3346.9(11) | -3523(10) | -209(3)  | 37.0(9)        |
| C00F | 6158.0(11) | 16737(12) | 4910(3)  | 40.2(10)       |
| C6   | 3075.2(12) | -1502(12) | 16(3)    | 42.3(11)       |
| C9   | 3606.5(12) | -3733(13) | 1377(3)  | 44.5(11)       |
| C00I | 6395.1(13) | 13668(11) | 3794(3)  | 43.0(11)       |
| C11  | 3878.8(12) | -6682(12) | 281(3)   | 39.9(10)       |
| C00K | 6940.5(12) | 11423(12) | 5066(3)  | 43.0(11)       |
| C2   | 3342.3(13) | -4198(12) | -1096(3) | 44.5(11)       |
| C7   | 3073.0(13) | -691(13)  | 913(3)   | 45.9(11)       |
| C00N | 6658.6(14) | 11578(13) | 3560(3)  | 49.4(12)       |
| C12  | 4410.5(12) | -9799(13) | 588(4)   | 45.8(11)       |
| C5   | 2819.7(13) | -343(14)  | -632(3)  | 49.5(13)       |
| C00Q | 6918.1(13) | 10551(13) | 4167(3)  | 46.9(11)       |
| C00R | 6721.3(14) | 14313(14) | 6228(3)  | 50.3(13)       |
| C00S | 6989.5(14) | 13183(15) | 6807(3)  | 52.5(13)       |
| C8   | 3318.4(13) | -1799(13) | 1549(3)  | 46.8(11)       |
| C00U | 7213.0(13) | 10257(13) | 5687(3)  | 47.4(11)       |
| C13  | 4726.5(12) | -7930(12) | 343(3)   | 44.4(11)       |
| C00W | 5619.2(13) | 19803(13) | 4596(4)  | 46.8(12)       |
| C00X | 7240.1(14) | 11078(15) | 6547(4)  | 54.9(14)       |
| C00Y | 5302.4(12) | 17881(13) | 4800(4)  | 46.6(12)       |
| C3   | 3093.8(14) | -3017(14) | -1724(3) | 50.1(12)       |
| C4   | 2825.9(14) | -1118(14) | -1496(4) | 52.3(13)       |

**Table S12 Anisotropic Displacement Parameters ( $\text{\AA}^2 \times 10^3$ ) for 2. The Anisotropic****displacement factor exponent takes the form:  $-2\pi^2[h^2a^{*2}U_{11}+2hka^*b^*U_{12}+\dots]$ .**

| Atom | $U_{11}$ | $U_{22}$ | $U_{33}$ | $U_{23}$ | $U_{13}$ | $U_{12}$ |
|------|----------|----------|----------|----------|----------|----------|
| O1   | 45.4(17) | 40(2)    | 51.5(17) | -1.7(15) | 8.3(14)  | 4.0(16)  |
| O002 | 55(2)    | 49(2)    | 55.0(18) | -8.1(17) | 1.0(15)  | 9.2(18)  |
| N2   | 43(3)    | 23(3)    | 51(3)    | 0        | 8(2)     | 0        |
| N1   | 38.5(18) | 40(2)    | 56(2)    | 9.2(19)  | 13.1(16) | 3.4(19)  |
| N006 | 43(2)    | 39(3)    | 59(2)    | -1.3(19) | 9.4(17)  | 1.2(19)  |
| N00A | 37(3)    | 38(4)    | 71(4)    | 0        | 10(2)    | 0        |
| C00B | 32.2(19) | 45(3)    | 51(2)    | 3(2)     | 10.2(18) | -5(2)    |
| C00C | 35(2)    | 38(3)    | 48(2)    | -1(2)    | 10.9(17) | -3(2)    |
| C10  | 31.8(19) | 31(2)    | 53(2)    | 0.1(19)  | 10.1(17) | -3.5(19) |
| C1   | 37(2)    | 20(2)    | 55(2)    | 4.8(18)  | 10.5(18) | -2.8(18) |
| C00F | 30.5(18) | 36(3)    | 55(2)    | -1(2)    | 10.0(17) | -3.9(18) |
| C6   | 34(2)    | 36(3)    | 58(3)    | 2(2)     | 9.9(19)  | -4(2)    |
| C9   | 39(2)    | 44(3)    | 52(2)    | 8(2)     | 10.1(19) | -4(2)    |
| C00I | 44(2)    | 30(3)    | 56(3)    | -4(2)    | 8(2)     | -3(2)    |
| C11  | 41(2)    | 30(2)    | 50(2)    | 5.0(19)  | 10.6(18) | -2.3(19) |
| C00K | 38(2)    | 37(3)    | 56(2)    | 1(2)     | 13.3(19) | -4(2)    |
| C2   | 47(2)    | 34(3)    | 55(2)    | 4(2)     | 15(2)    | -1(2)    |
| C7   | 38(2)    | 44(3)    | 56(3)    | -1(2)    | 10.5(19) | 4(2)     |
| C00N | 51(3)    | 41(3)    | 59(3)    | -2(2)    | 19(2)    | -3(2)    |
| C12  | 42(2)    | 32(3)    | 66(3)    | 3(2)     | 15(2)    | 7(2)     |
| C5   | 37(2)    | 49(3)    | 62(3)    | -2(2)    | 4(2)     | 6(2)     |
| C00Q | 41(2)    | 38(3)    | 64(3)    | -4(2)    | 16(2)    | 0(2)     |
| C00R | 43(2)    | 55(3)    | 55(3)    | 1(3)     | 14(2)    | 4(2)     |
| C00S | 46(2)    | 58(4)    | 53(3)    | 0(2)     | 2(2)     | -9(3)    |
| C8   | 45(2)    | 45(3)    | 52(2)    | -3(2)    | 13.8(19) | 3(2)     |
| C00U | 41(2)    | 35(3)    | 68(3)    | 4(2)     | 14(2)    | 0(2)     |
| C13  | 38(2)    | 33(3)    | 63(3)    | 1(2)     | 10.8(19) | 5(2)     |
| C00W | 38(2)    | 37(3)    | 67(3)    | 7(2)     | 12(2)    | 2(2)     |
| C00X | 48(3)    | 51(4)    | 64(3)    | 10(3)    | 0(2)     | -4(2)    |
| C00Y | 38(2)    | 32(3)    | 70(3)    | -4(2)    | 8(2)     | -2(2)    |
| C3   | 51(3)    | 45(3)    | 56(3)    | 1(2)     | 11(2)    | -11(2)   |
| C4   | 45(2)    | 49(3)    | 61(3)    | 9(2)     | -4(2)    | -4(2)    |

**Table S13 Bond Lengths for 2.**

| Atom | Atom              | Length/Å | Atom | Atom | Length/Å |
|------|-------------------|----------|------|------|----------|
| O1   | C9                | 1.263(6) | C1   | C6   | 1.431(6) |
| O002 | C00I              | 1.293(6) | C1   | C2   | 1.399(7) |
| N2   | C13               | 1.448(6) | C6   | C7   | 1.431(7) |
| N2   | C13 <sup>1</sup>  | 1.448(6) | C6   | C5   | 1.399(7) |
| N1   | C11               | 1.292(6) | C9   | C8   | 1.429(7) |
| N1   | C12               | 1.474(6) | C00I | C00N | 1.433(7) |
| N006 | C00F              | 1.319(6) | C00K | C00Q | 1.433(7) |
| N006 | C00W              | 1.441(7) | C00K | C00U | 1.413(7) |
| N00A | C00Y              | 1.491(6) | C2   | C3   | 1.367(7) |
| N00A | C00Y <sup>2</sup> | 1.492(6) | C7   | C8   | 1.355(7) |
| C00B | C00C              | 1.462(7) | C00N | C00Q | 1.347(8) |
| C00B | C00K              | 1.407(7) | C12  | C13  | 1.530(7) |
| C00B | C00R              | 1.410(7) | C5   | C4   | 1.379(8) |
| C00C | C00F              | 1.417(7) | C00R | C00S | 1.359(8) |
| C00C | C00I              | 1.423(7) | C00S | C00X | 1.417(9) |
| C10  | C1                | 1.467(6) | C00U | C00X | 1.369(8) |
| C10  | C9                | 1.438(7) | C00W | C00Y | 1.525(7) |
| C10  | C11               | 1.402(7) | C3   | C4   | 1.388(8) |

<sup>1</sup>1-X,+Y,-Z; <sup>2</sup>1-X,+Y,1-Z

**Table S14 Bond Angles for 2.**

| Atom | Atom | Atom              | Angle/°  | Atom | Atom | Atom | Angle/°  |
|------|------|-------------------|----------|------|------|------|----------|
| C13  | N2   | C13 <sup>1</sup>  | 112.6(6) | O002 | C00I | C00C | 121.2(5) |
| C11  | N1   | C12               | 122.6(4) | O002 | C00I | C00N | 120.1(4) |
| C00F | N006 | C00W              | 124.0(4) | C00C | C00I | C00N | 118.6(4) |
| C00Y | N00A | C00Y <sup>2</sup> | 107.9(6) | N1   | C11  | C10  | 124.6(4) |
| C00K | C00B | C00C              | 117.4(4) | C00B | C00K | C00Q | 120.1(5) |
| C00K | C00B | C00R              | 118.9(5) | C00B | C00K | C00U | 119.1(5) |
| C00R | C00B | C00C              | 123.7(5) | C00U | C00K | C00Q | 120.8(5) |
| C00F | C00C | C00B              | 120.2(4) | C3   | C2   | C1   | 122.6(5) |
| C00F | C00C | C00I              | 118.9(4) | C8   | C7   | C6   | 121.8(5) |
| C00I | C00C | C00B              | 121.0(4) | C00Q | C00N | C00I | 120.5(5) |
| C9   | C10  | C1                | 120.6(4) | N1   | C12  | C13  | 109.3(4) |
| C11  | C10  | C1                | 119.9(4) | C4   | C5   | C6   | 120.7(5) |
| C11  | C10  | C9                | 119.5(4) | C00N | C00Q | C00K | 122.4(5) |
| C6   | C1   | C10               | 119.0(4) | C00S | C00R | C00B | 120.5(5) |
| C2   | C1   | C10               | 124.6(4) | C00R | C00S | C00X | 121.5(5) |
| C2   | C1   | C6                | 116.4(4) | C7   | C8   | C9   | 123.2(5) |
| N006 | C00F | C00C              | 123.8(4) | C00X | C00U | C00K | 121.6(5) |
| C7   | C6   | C1                | 118.5(4) | N2   | C13  | C12  | 112.8(4) |
| C5   | C6   | C1                | 120.4(5) | N006 | C00W | C00Y | 109.2(4) |
| C5   | C6   | C7                | 121.1(5) | C00U | C00X | C00S | 118.3(5) |
| O1   | C9   | C10               | 123.6(4) | N00A | C00Y | C00W | 109.8(4) |
| O1   | C9   | C8                | 119.6(4) | C2   | C3   | C4   | 120.5(5) |
| C8   | C9   | C10               | 116.7(4) | C5   | C4   | C3   | 119.4(5) |

<sup>1</sup>1-X,+Y,-Z; <sup>2</sup>1-X,+Y,1-Z

**Table S15 Torsion Angles for 2.**

| A    | B    | C    | D    | Angle/°   | A                 | B    | C    | D    | Angle/°   |
|------|------|------|------|-----------|-------------------|------|------|------|-----------|
| O1   | C9   | C8   | C7   | 176.1(5)  | C9                | C10  | C1   | C6   | -1.6(6)   |
| O002 | C00I | C00N | C00Q | 179.5(5)  | C9                | C10  | C1   | C2   | 176.8(5)  |
| N1   | C12  | C13  | N2   | -174.0(4) | C9                | C10  | C11  | N1   | -0.3(7)   |
| N006 | C00W | C00Y | N00A | -176.4(4) | C00I              | C00C | C00F | N006 | 1.0(7)    |
| C00B | C00C | C00F | N006 | 179.8(5)  | C00I              | C00N | C00Q | C00K | 1.3(8)    |
| C00B | C00C | C00I | O002 | 179.5(5)  | C11               | N1   | C12  | C13  | 87.7(6)   |
| C00B | C00C | C00I | C00N | -0.4(7)   | C11               | C10  | C1   | C6   | 179.4(4)  |
| C00B | C00K | C00Q | C00N | -1.1(8)   | C11               | C10  | C1   | C2   | -2.3(7)   |
| C00B | C00K | C00U | C00X | -0.4(8)   | C11               | C10  | C9   | O1   | 2.2(7)    |
| C00B | C00R | C00S | C00X | -1.4(9)   | C11               | C10  | C9   | C8   | -177.1(5) |
| C00C | C00B | C00K | C00Q | 0.1(7)    | C00K              | C00B | C00C | C00F | -178.2(4) |
| C00C | C00B | C00K | C00U | -179.9(5) | C00K              | C00B | C00C | C00I | 0.6(7)    |
| C00C | C00B | C00R | C00S | -179.2(5) | C00K              | C00B | C00R | C00S | 0.1(8)    |
| C00C | C00I | C00N | C00Q | -0.5(8)   | C00K              | C00U | C00X | C00S | -0.9(9)   |
| C10  | C1   | C6   | C7   | -0.2(7)   | C2                | C1   | C6   | C7   | -178.7(5) |
| C10  | C1   | C6   | C5   | 179.5(5)  | C2                | C1   | C6   | C5   | 1.0(7)    |
| C10  | C1   | C2   | C3   | -178.5(5) | C2                | C3   | C4   | C5   | 2.3(8)    |
| C10  | C9   | C8   | C7   | -4.6(8)   | C7                | C6   | C5   | C4   | 179.5(5)  |
| C1   | C10  | C9   | O1   | -176.9(4) | C12               | N1   | C11  | C10  | -177.7(4) |
| C1   | C10  | C9   | C8   | 3.8(7)    | C5                | C6   | C7   | C8   | 179.9(5)  |
| C1   | C10  | C11  | N1   | 178.7(4)  | C00Q              | C00K | C00U | C00X | 179.6(5)  |
| C1   | C6   | C7   | C8   | -0.4(8)   | C00R              | C00B | C00C | C00F | 1.1(8)    |
| C1   | C6   | C5   | C4   | -0.2(8)   | C00R              | C00B | C00C | C00I | 179.8(5)  |
| C1   | C2   | C3   | C4   | -1.5(8)   | C00R              | C00B | C00K | C00Q | -179.1(5) |
| C00F | N006 | C00W | C00Y | -89.2(6)  | C00R              | C00B | C00K | C00U | 0.8(7)    |
| C00F | C00C | C00I | O002 | -1.7(7)   | C00R              | C00S | C00X | C00U | 1.9(9)    |
| C00F | C00C | C00I | C00N | 178.3(5)  | C00U              | C00K | C00Q | C00N | 178.9(5)  |
| C6   | C1   | C2   | C3   | -0.1(7)   | C13 <sup>1</sup>  | N2   | C13  | C12  | 172.0(5)  |
| C6   | C7   | C8   | C9   | 3.0(9)    | C00W              | N006 | C00F | C00C | 173.3(5)  |
| C6   | C5   | C4   | C3   | -1.4(9)   | C00Y <sub>2</sub> | N00A | C00Y | C00W | -179.7(5) |

<sup>1</sup>1-X,+Y,-Z; <sup>2</sup>1-X,+Y,1-Z

**Table S16 Hydrogen Atom Coordinates ( $\text{\AA}\times 10^4$ ) and Isotropic Displacement Parameters ( $\text{\AA}^2\times 10^3$ ) for 2.**

| <b>Atom</b> | <b><i>x</i></b> | <b><i>y</i></b> | <b><i>z</i></b> | <b>U(eq)</b> |
|-------------|-----------------|-----------------|-----------------|--------------|
| H2A         | 4895.87         | -10905.74       | -422.79         | 46           |
| H2B         | 5104.12         | -10905.8        | 422.78          | 46           |
| H1          | 4129.43         | -7319.61        | 1383.12         | 53           |
| H006        | 5900.19         | 17458.95        | 3806.69         | 56           |
| H00A        | 4929.17         | 21013.5         | 4543.8          | 58           |
| H00B        | 5070.84         | 21013.55        | 5456.18         | 58           |
| H00F        | 6173.88         | 17360.02        | 5488.98         | 48           |
| H11         | 3875.59         | -7261.89        | -299.33         | 48           |
| H2          | 3515.3          | -5501.91        | -1265.89        | 53           |
| H7          | 2898.43         | 631.62          | 1064.9          | 55           |
| H00N        | 6650.4          | 10926.03        | 2985.05         | 59           |
| H12A        | 4314.47         | -11020.56       | 94.86           | 55           |
| H12B        | 4491.78         | -11122.14       | 1070.47         | 55           |
| H5          | 2643.77         | 963.46          | -479.16         | 59           |
| H00Q        | 7088.78         | 9227.58         | 3995.49         | 56           |
| H00R        | 6557.2          | 15658.02        | 6418.41         | 60           |
| H00S        | 7009.04         | 13806.59        | 7385.92         | 63           |
| H8          | 3298.4          | -1275.58        | 2124.82         | 56           |
| H00U        | 7377.92         | 8899.79         | 5505.92         | 57           |
| H13A        | 4637.12         | -6453.92        | -90.81          | 53           |
| H13B        | 4834.31         | -6861.71        | 856.18          | 53           |
| H00C        | 5542.02         | 21173.22        | 4122.65         | 56           |
| H00D        | 5708.68         | 20975.52        | 5105.52         | 56           |
| H00X        | 7418.4          | 10274.48        | 6951.66         | 66           |
| H00E        | 5223.38         | 16613.62        | 4303.47         | 56           |
| H00G        | 5376.35         | 16599.01        | 5297.14         | 56           |
| H3          | 3104.34         | -3489.22        | -2307.96        | 60           |
| H4          | 2652.17         | -375.5          | -1922.97        | 63           |
